# Supplementary material
Source: publisher figshare collection journal article supplement (https://geolsoc.figshare.com/ndownloader/files/28110831)
Supplement: Supplementary file 1 [file 28110831]

| Spot | 206Pbc  (%) | U  (ppm) | Th  (ppm) | 232Th/238U | 206Pb*  (ppm) | 207Pb*/206Pb* | error%  (1σ) | 207Pb*/235U | error%  (1σ) | 206Pb*/238U | error%  (1σ) | 206Pb/238U Age | |
| --- | --- | --- | --- | --- | --- | --- | --- | --- | --- | --- | --- | --- | --- |
| JW03-001 | 0.01 | 6329 | 9736 | 1.59 | 231 | 0.06451 | 0.52 | 0.3848 | 1.2 | 0.04326 | 1.0 | 268.5 | ± 2.8 |
| JW03-002 | 0.03 | 4041 | 8510 | 2.18 | 146 | 0.06944 | 0.61 | 0.4111 | 1.2 | 0.04294 | 1.0 | 265.1 | ± 2.7 |
| JW 03-003 | 0.08 | 2557 | 2777 | 1.12 | 89.3 | 0.05482 | 0.88 | 0.3083 | 1.4 | 0.04079 | 1.1 | 256.6 | ± 2.7 |
| JW 03-004 | 0.05 | 4182 | 4348 | 1.07 | 150 | 0.05797 | 0.64 | 0.3353 | 1.2 | 0.04195 | 1.0 | 262.7 | ± 2.7 |
| JW 03-005 | 0.01 | 5675 | 4696 | 0.86 | 204 | 0.05670 | 0.56 | 0.3300 | 1.2 | 0.04222 | 1.0 | 264.7 | ± 2.7 |
| JW 03-006 | -- | 4664 | 2626 | 0.58 | 167 | 0.05338 | 0.63 | 0.3083 | 1.2 | 0.04189 | 1.0 | 263.9 | ± 2.7 |
| JW 03-007 | 0.11 | 1682 | 2266 | 1.39 | 59.9 | 0.05749 | 0.99 | 0.3311 | 1.5 | 0.04177 | 1.1 | 261.7 | ± 2.8 |
| JW 03-008 | 0.01 | 4508 | 4355 | 1.00 | 159 | 0.06010 | 0.60 | 0.3446 | 1.2 | 0.04158 | 1.0 | 259.7 | ± 2.7 |
| JW 03-009 | 0.00 | 3767 | 7865 | 2.16 | 133 | 0.07334 | 0.63 | 0.4264 | 1.2 | 0.04217 | 1.0 | 259.0 | ± 2.7 |

Table S1. The SHRIMP U-Pb testing results.
